# Supplementary figures and images for: Morphological control of vertically self-aligned nanosheets formed on magnesium alloy by surfactant-free hydrothermal synthesis
Source: Royal Society of Chemistry journal article supplement (doi:10.1039/b907490b), 2009-01-01

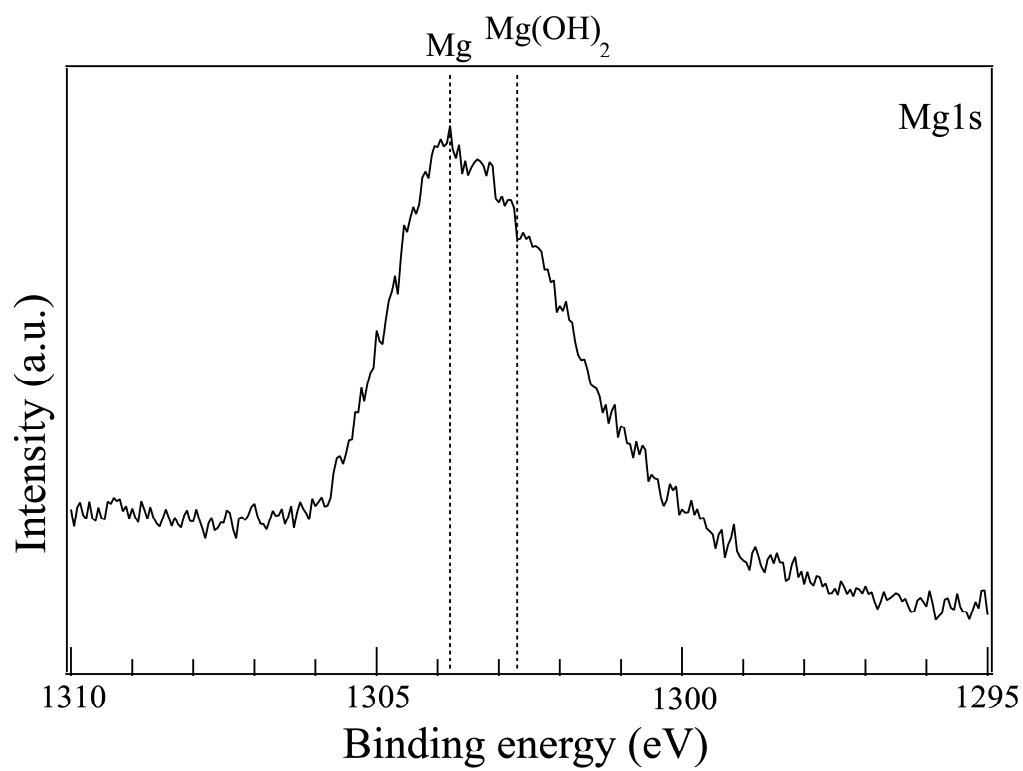

Figure S1: XPS spectrum of the sample obtained at 150 °C for 6 hours.

Supplement: b907490b.pdf [file b907490b.pdf]
